# Supplementary material for: Evaluation of the Prebiotic Potential of a Commercial Synbiotic Food Ingredient on Gut Microbiota in an Ex Vivo Model of the Human Colon
Source: PubMed Central journal article supplement (PMC7551822; doi:10.3390/nu12092669), 2020-09-01
Supplement: nutrients-12-02669-s001.pdf [file nutrients-12-02669-s001.pdf]

### Supplementary Materials:

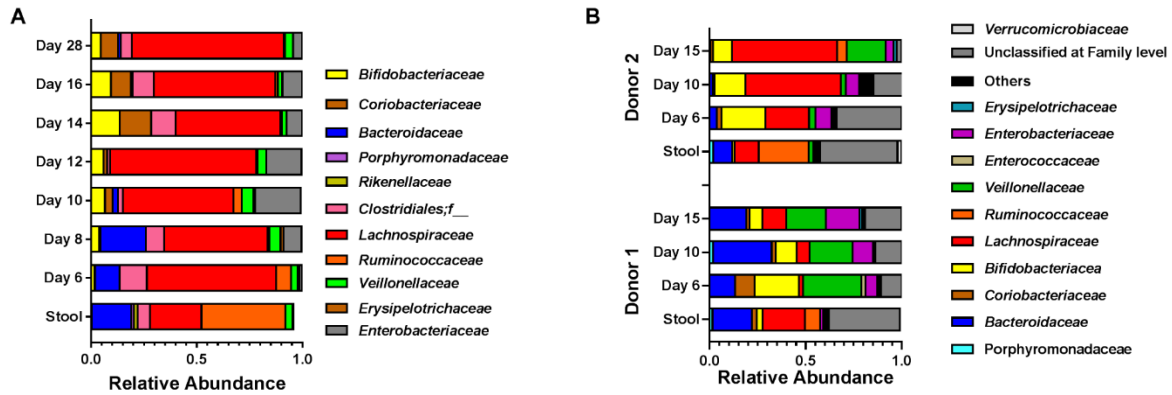

**Figure S1. The composition of gut microbiota developed in the colonic fermentation model during stabilization period.** A) Microbial composition at the family level developed in the inoculating bioreactor over 28 days from immobilized fecal microbiota. The stool samples donated by a third donor (Female, 25 yrs.). B) Microbial composition developed in the inoculating bioreactor over the stabilization period for the 2 donors employed in the current study. Families with abundance >1% are presented while others are grouped together (Others).

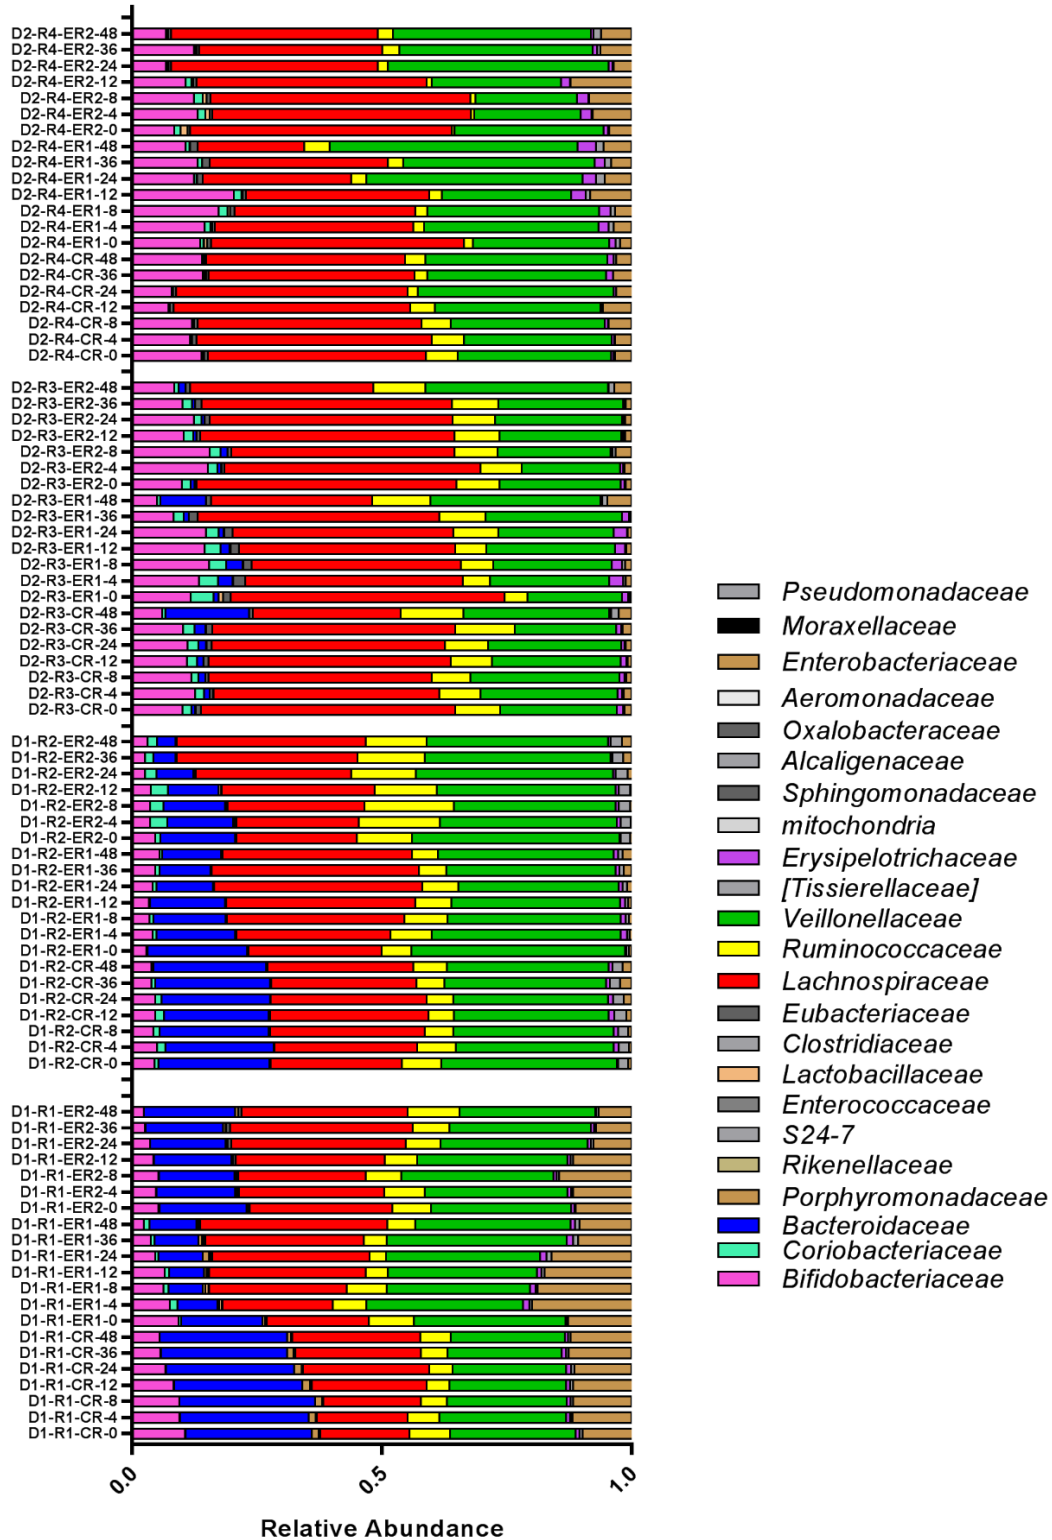

**Figure S2. Relative abundances of gut microbiota Families developed in different bioreactors of colonic fermentation model over 48 hours.** Samples are named as Donor-Replicate-Bioreactor-Hours post treatment. CR; no treatment control bioreactor, ER1; test formula treated bioreactor, ER2; MC-cellulose treated bioreactor.

A)

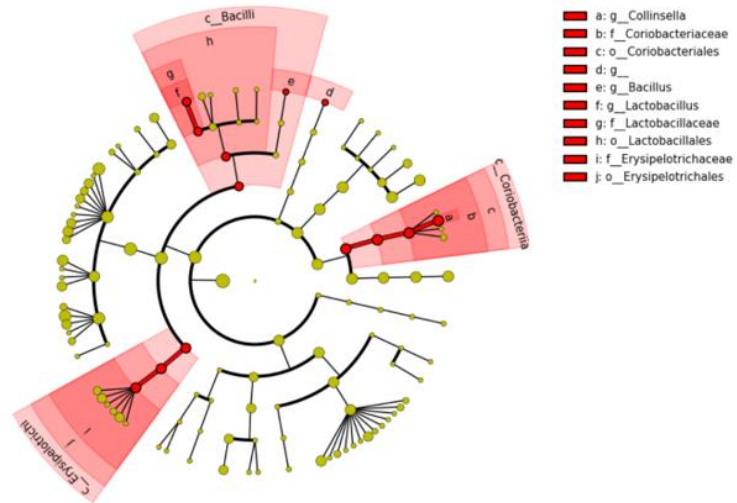

B)

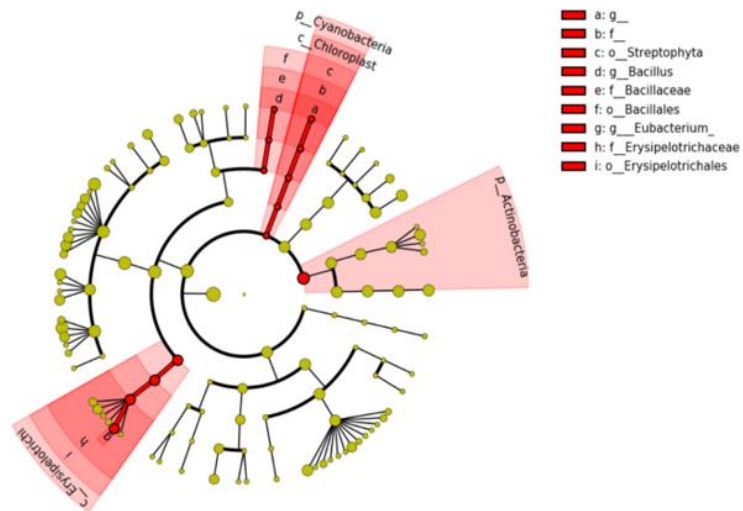

Figure S3: Cladograms showing the taxonomic relations between significantly differential taxa that are enriched after the test formula treatment as compared to no-treatment control(A) and MC-cellulose control. The analyses and the figure construction were done by linear discriminant effect size analysis (LEfSe).
